# Supplementary material for: Direct Interaction Between CD34+ Hematopoietic Stem Cells and Mesenchymal Stem Cells Reciprocally Preserves Stemness
Source: Preprints.org preprint supplement (doi:10.20944/preprints202409.2390.v1), 2024-09-30

Represented Figure 1C

N-Cadherin and GAPDH probing

N-Cadherin →

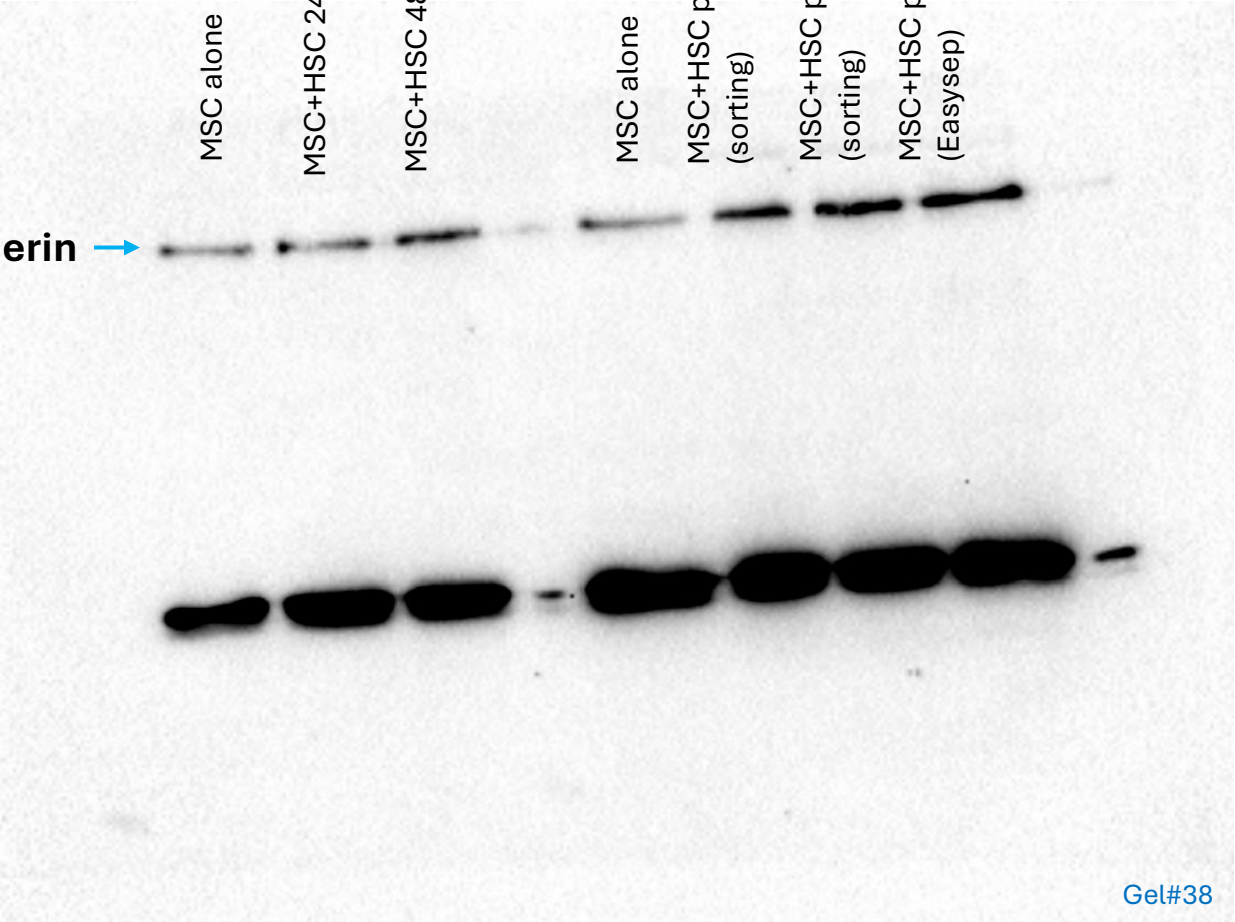

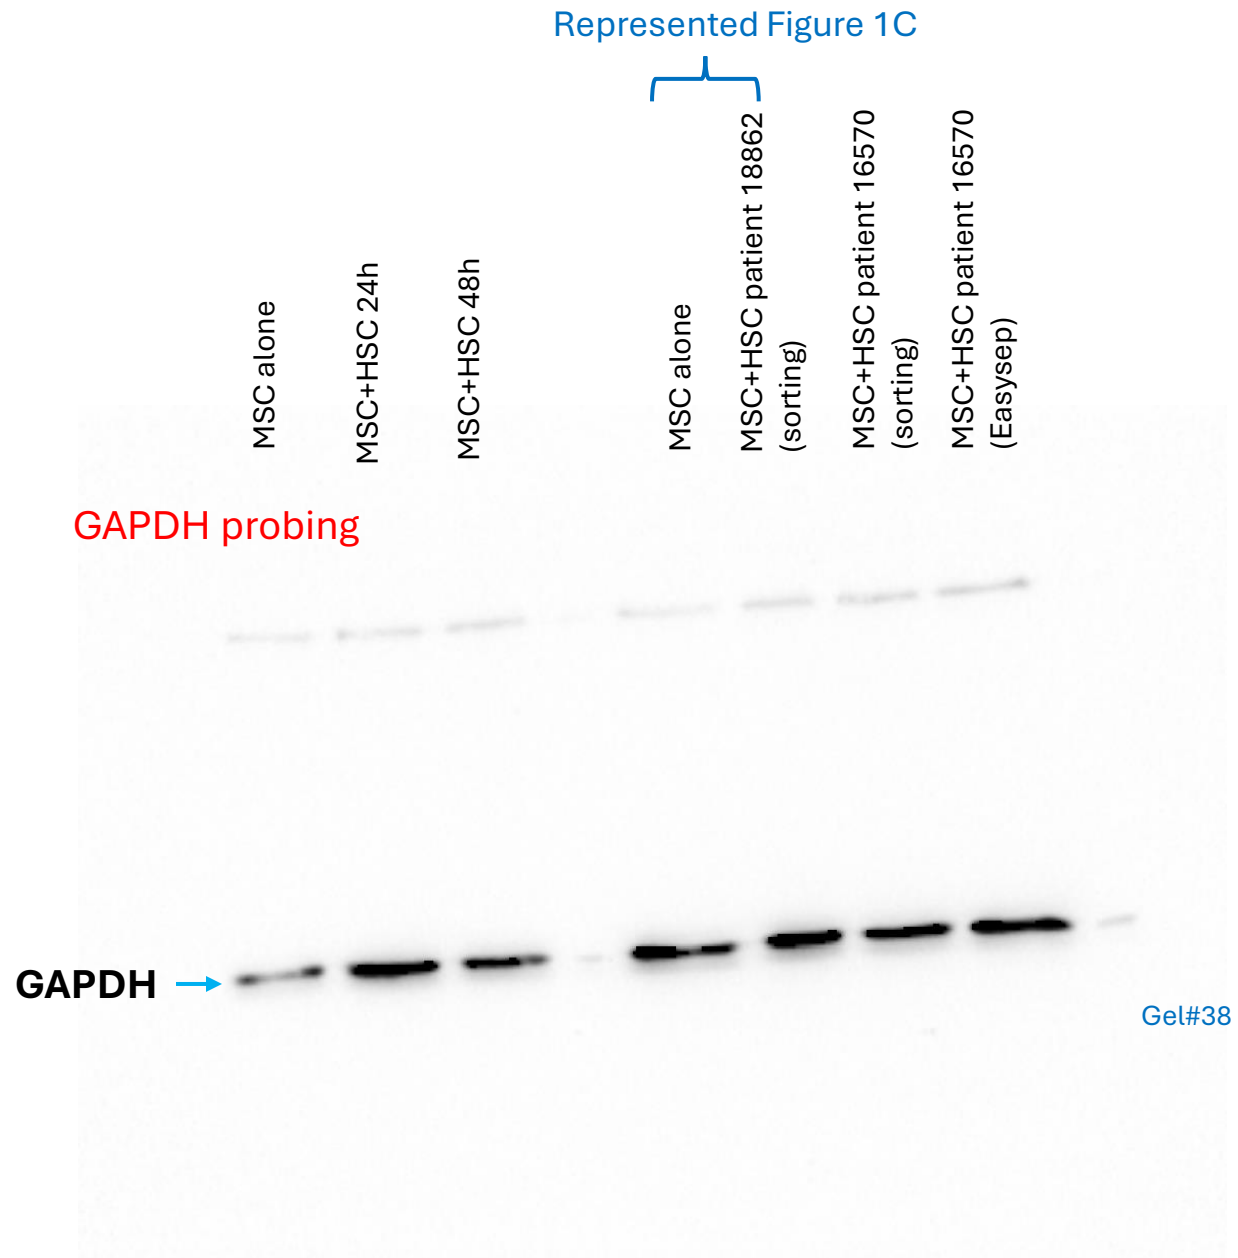

Represented Figure 1C

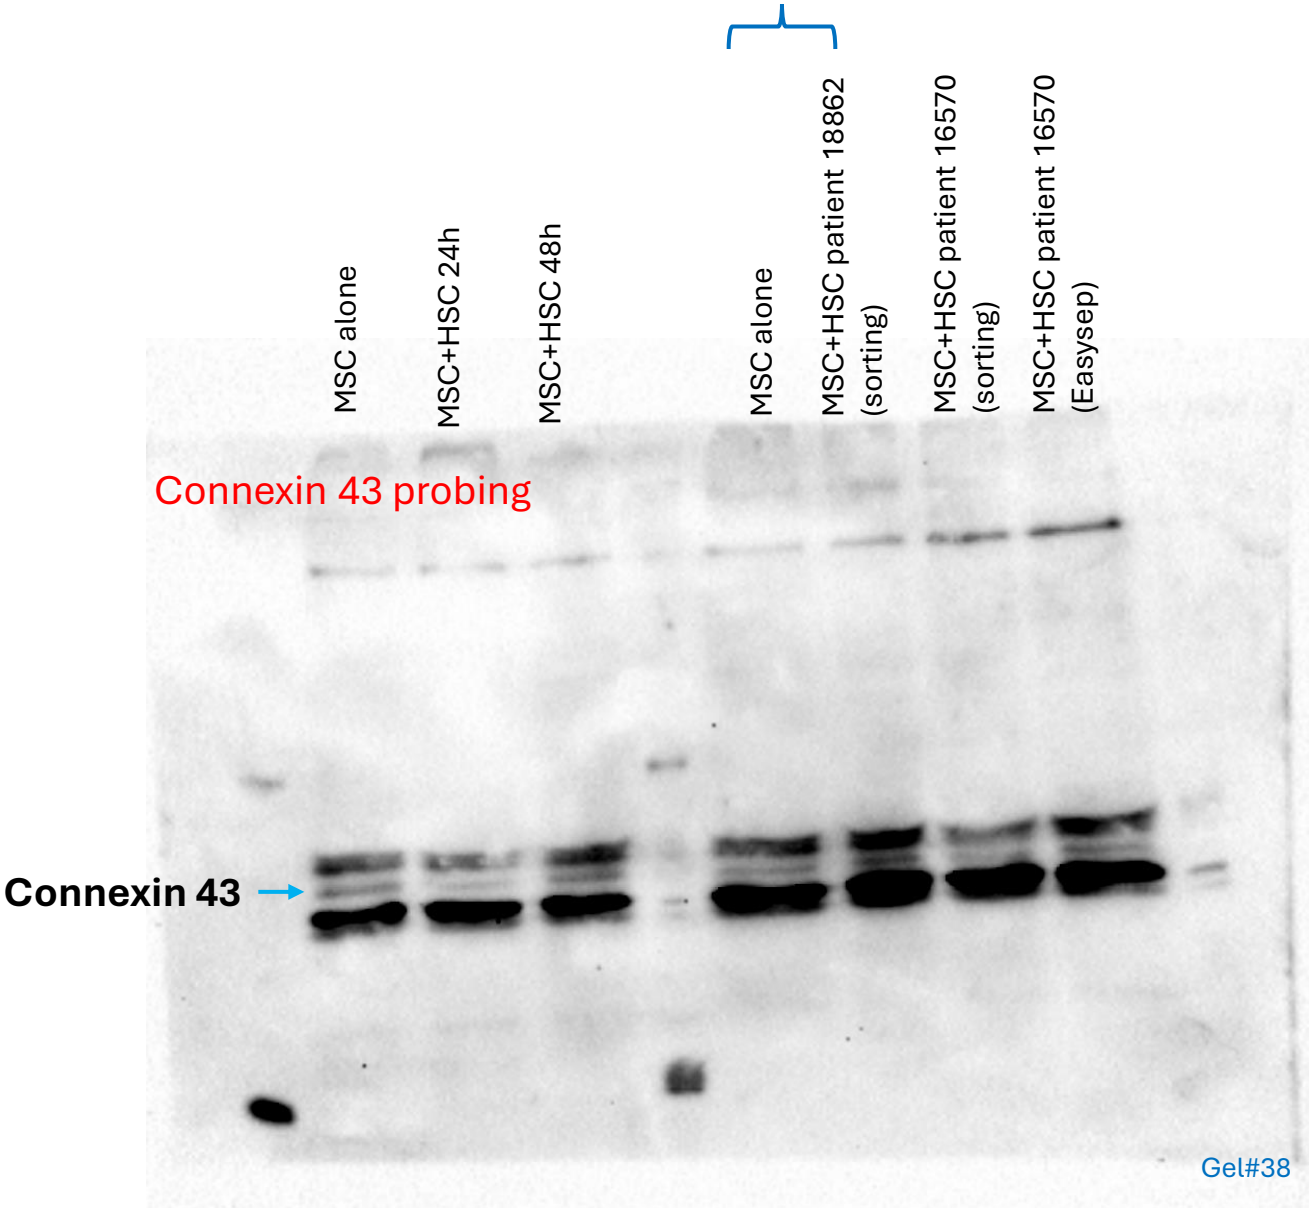

Connexin 34 and GAPDH probing

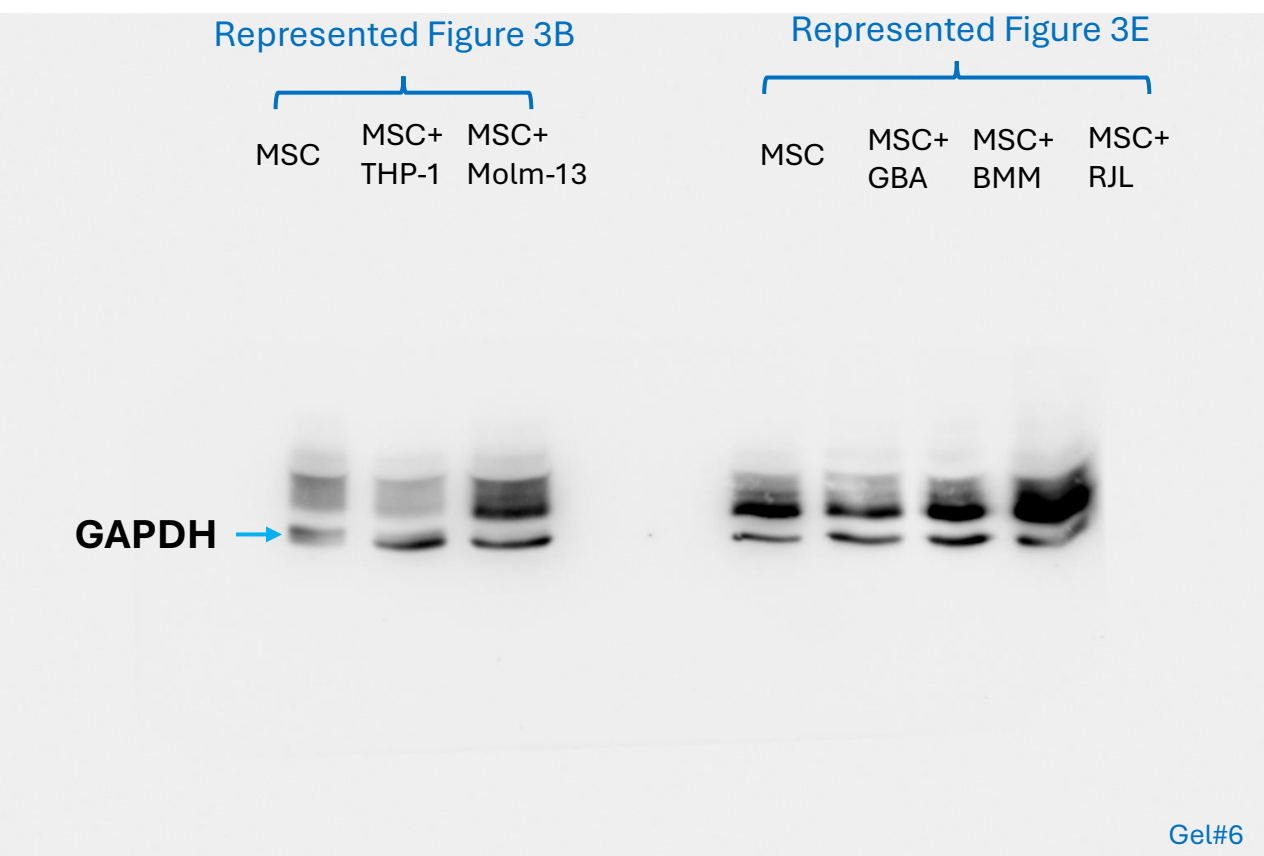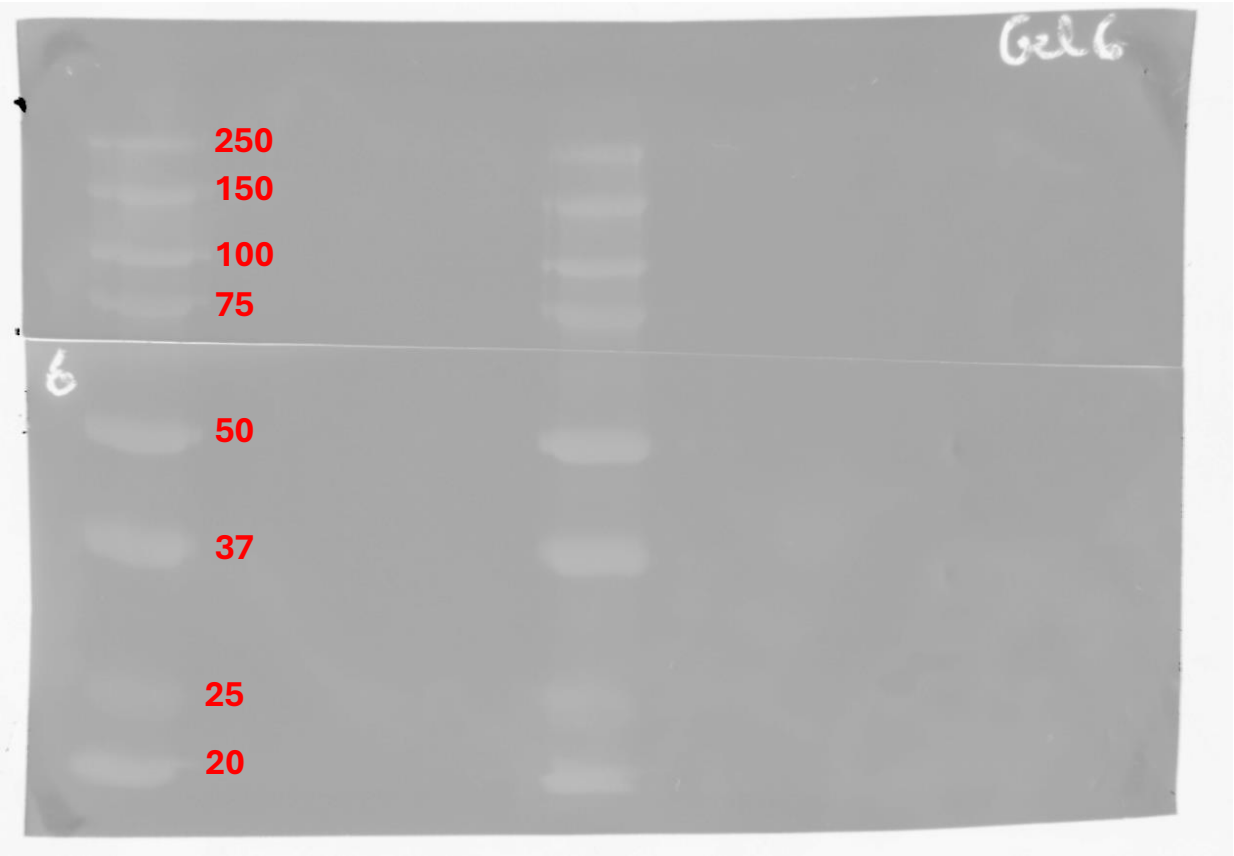

Connexin 43 and N-Cadherin probing

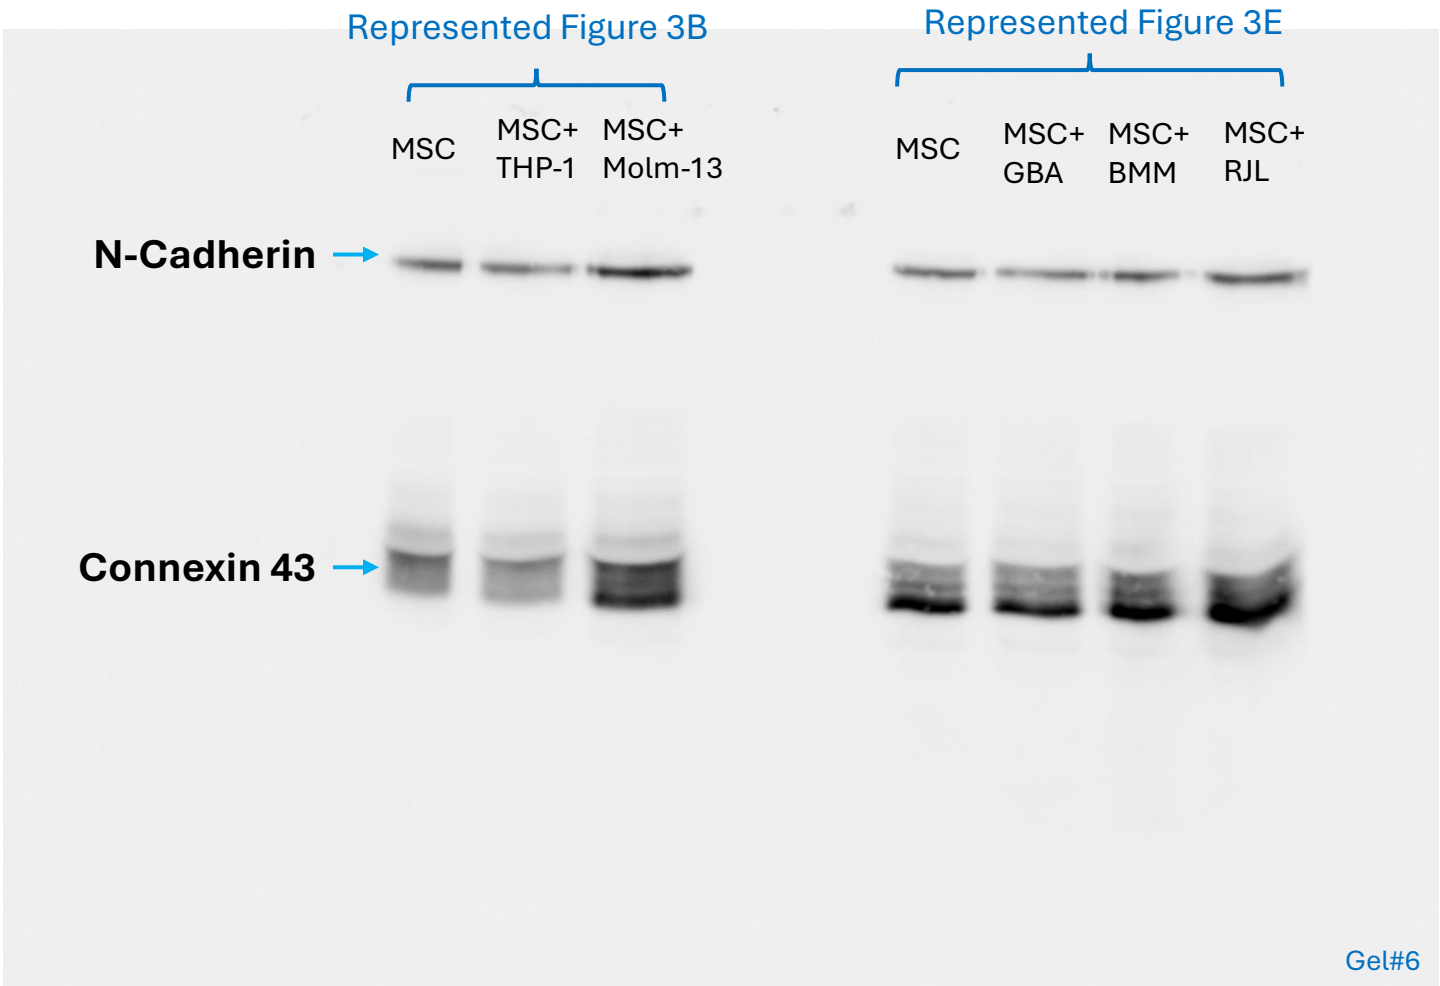

Supplement: Supplementary file 1 [file supplementary]
