# Supplementary material for: Direct Interaction Between CD34+ Hematopoietic Stem Cells and Mesenchymal Stem Cells Reciprocally Preserves Stemness
Source: Preprints.org preprint supplement (doi:10.20944/preprints202409.2390.v1), 2024-09-30
Supplement: Supplementary file 2 [file supplementary]

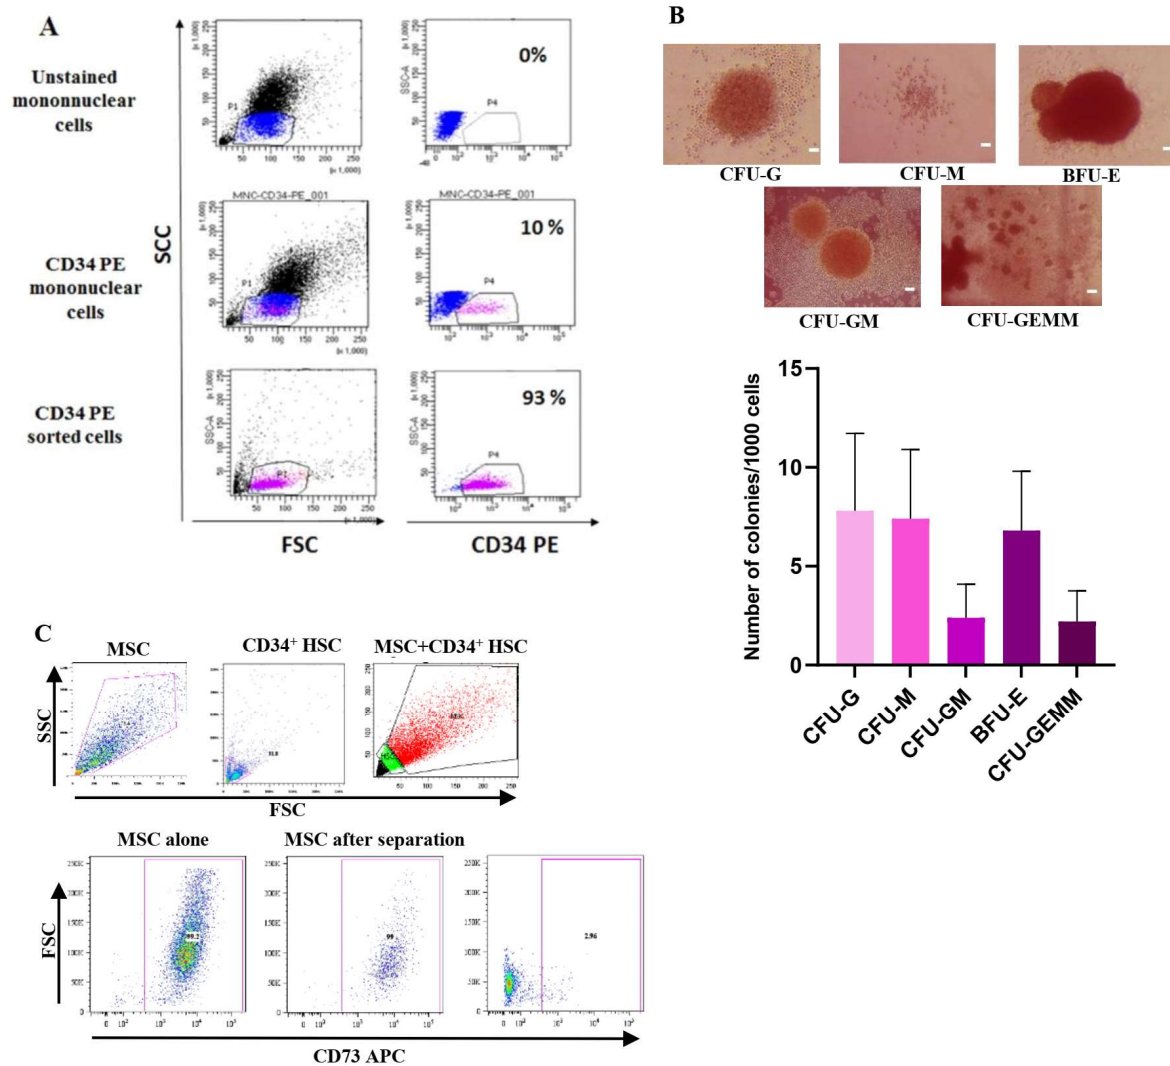

**Supplementary Figure 1:** **A.** Flow cytometry graphs showing the percentage of CD34<sup>+</sup> cells in mobilized peripheral blood from a Multiple Myeloma patient. **B.** Light microscopy images of different colonies formed by the adherent fraction of HSCs. Scale bar, 100μm. Clonogenic potential of HSCs represented by the number of colonies obtained from CD34<sup>+</sup> cells isolated by cell sorting from mobilized peripheral blood. This experiment was repeated independently three times. **C.** Flow cytometry graphs showing the separation of MSCs and HSCs after co-culture, according to the size and the expression of CD73 marker.

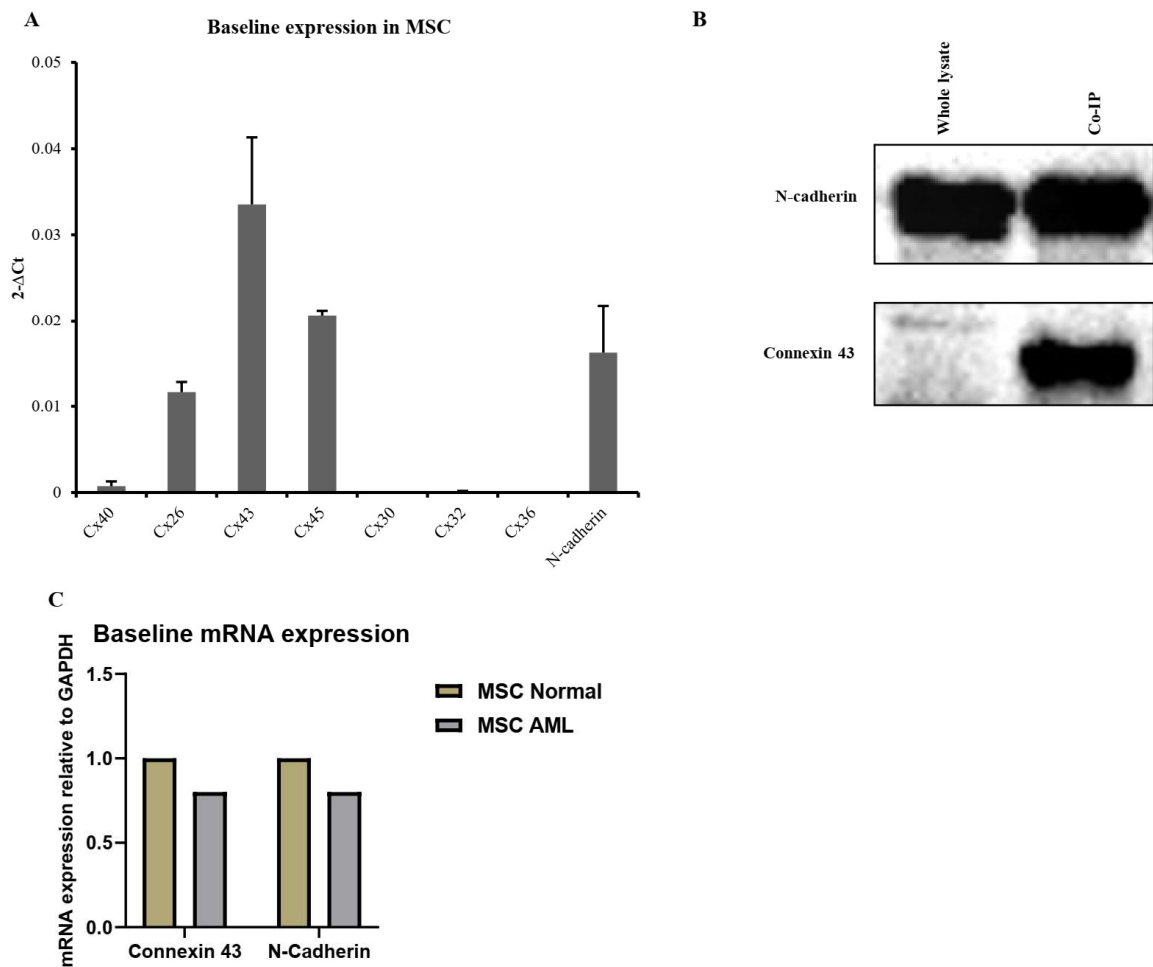

**Supplementary Figure 2:** **A.** Histograms representing the baseline expression of connexins and N-cadherin in MSC. **B.** Co-immunoprecipitation of free Cx-43 with N-cadherin in MSC cells. Western blot analysis of MSC whole-cell lysate (left) and immunoprecipitates by Cx-43 antibody (right). **C.** Baseline mRNA expression of Cx-43 and N-cadherin in MSCs from healthy and AML subjects.

**Supplementary Table 1:** Source of CD34<sup>+</sup> cells.

| Type of leukemia | %CD34 <sup>+</sup> | %CD34 <sup>+</sup> /CD38 <sup>-</sup> /CD45 <sup>-</sup> |
|------------------|--------------------|----------------------------------------------------------|
| T-cell Lymphoma  | 1.1                | 0.8                                                      |
|                  | 1.3                | 0.7                                                      |
| Hodgkin Lymphoma | 0.5                | 0.2                                                      |
|                  | 0.4                | 0.3                                                      |

|                      |     |     |
|----------------------|-----|-----|
|                      | 2.7 | 2.5 |
| Non-Hodgkin Lymphoma | 0.2 | 0.1 |
|                      | 0.4 | 0.3 |
| Lymphoma             | 1.6 | 1.4 |
| Multiple Myeloma     | 4   | 2.2 |
|                      | 2   | 1.2 |
| Ewing Sarcoma        | 0.4 | 0.2 |
| Neuroblastoma        | 0.2 | 0.1 |

**Supplementary Table 2:** Primary AML cells used in the study.

| <i>Patient number</i> | <i>Age</i> | <i>Sex</i> | <i>Diagnostic/relapse</i> | <i>Source</i>    | <i>Molecular/<br/>Cytogenetics</i> |
|-----------------------|------------|------------|---------------------------|------------------|------------------------------------|
| <i>AML 1</i>          | 76         | Female     | Relapse                   | Peripheral blood | FLT3 mutation/46,XX                |
| <i>AML 2</i>          | 95         | Female     | Diagnostic                | Peripheral blood | ND                                 |
| <i>AML 3</i>          | 67         | Female     | Diagnostic                | Peripheral blood | NPM1 mutation/46,XX                |

ND: not determined.
